# Supplementary material for: Electrocardiographic characteristics, anthropometric features, and cardiovascular risk factors in a large cohort of adolescents
Source: PubMed Central journal article supplement — Europace. 2018 Apr 23;20(11):1833–40. doi: 10.1093/europace/euy073 (PMC6212775; doi:10.1093/europace/euy073), 2018-04-23
Supplement: euy073_supplement_table_s1.pdf [file euy073_supplement_table_s1.pdf]

## Supplementary data online

**Table S1.** Major and minor ECG abnormalities prevalence by obesity degree

| <b>ECG finding</b> | <b>Normal BMI (%)</b> | <b>I degree obesity (%)</b> | <b>P (vs. normal)</b> | <b>II degree obesity (%)</b> | <b>P (vs. normal)</b> |
|--------------------|-----------------------|-----------------------------|-----------------------|------------------------------|-----------------------|
| Major              | 1.8                   | 1.2                         | 0.005                 | 0.9                          | 0.048                 |
| Minor              | 22.2                  | 14.9                        | <0.0001               | 11.9                         | <0.0001               |
| <b>Total</b>       | <b>23.9</b>           | <b>16.0</b>                 | <b>&lt;0.0001</b>     | <b>12.8</b>                  | <b>&lt;0.0001</b>     |

Prevalence of major and minor ECG abnormalities found in normal, I and II degree obesity.

BMI indicates body-mass index
